# Supplementary material for: Medical Cost of Cancer Care for Privately Insured Children in Chile
Source: MDPI journal article supplement (doi:10.3390/ijerph18136746), 2021-06-23
Supplement: s1 [file s1]

**Supplementary Material for:**

**Medical Cost of Cancer Care for Privately Insured Children in Chile,**

**by Florencia Borrescio-Higa and Nieves Valdés**

**Table S1.** Quasi-Maximum likelihood estimates of Generalized Linear Models with log link function and gamma distribution for total medical costs and out-of-pocket payments, by type of care, 2007 to 2018. Private health insurance system.

| VARIABLES                           | Total Costs          |                      |                      | Out-of-pocket        |                      |                      |
|-------------------------------------|----------------------|----------------------|----------------------|----------------------|----------------------|----------------------|
|                                     | (1)<br>All           | (2)<br>Inpatient     | (3)<br>Outpatient    | (4)<br>All           | (5)<br>Inpatient     | (6)<br>Outpatient    |
| <i>Patient</i>                      |                      |                      |                      |                      |                      |                      |
| Age 5-9                             | -0.429***<br>(0.005) | -0.464***<br>(0.006) | 0.041<br>(0.006)     | -0.462***<br>(0.008) | -0.528***<br>(0.010) | -0.069<br>(0.009)    |
| Age 10-14                           | -0.297***<br>(0.007) | -0.34***<br>(0.008)  | 0.22**<br>(0.010)    | -0.222*<br>(0.014)   | -0.272**<br>(0.017)  | 0.039<br>(0.009)     |
| Age 15-17                           | -0.297***<br>(0.008) | -0.35***<br>(0.010)  | 0.279**<br>(0.012)   | -0.215*<br>(0.015)   | -0.273**<br>(0.018)  | 0.061<br>(0.010)     |
| Male                                | 0.042<br>(0.003)     | 0.043<br>(0.003)     | 0.04<br>(0.005)      | -0.026<br>(0.006)    | -0.038<br>(0.007)    | 0.014<br>(0.005)     |
| Leukemia                            | 0.922***<br>(0.004)  | 0.945***<br>(0.005)  | 0.609***<br>(0.006)  | 0.672***<br>(0.009)  | 0.722***<br>(0.011)  | 0.354***<br>(0.006)  |
| Brain or nervous system             | 0.687***<br>(0.007)  | 0.68***<br>(0.008)   | 0.688***<br>(0.012)  | 0.837***<br>(0.016)  | 0.841***<br>(0.017)  | 0.738***<br>(0.022)  |
| Non-Hodgkin's lymphoma              | 0.613***<br>(0.014)  | 0.634***<br>(0.016)  | 0.393***<br>(0.015)  | 0.514***<br>(0.023)  | 0.523***<br>(0.027)  | 0.517***<br>(0.022)  |
| Bone or articular cartilage         | 0.659***<br>(0.015)  | 0.682***<br>(0.016)  | 0.344**<br>(0.018)   | 0.638***<br>(0.033)  | 0.691***<br>(0.038)  | 0.355***<br>(0.015)  |
| Mesothelioma soft tissues           | 0.399***<br>(0.018)  | 0.403***<br>(0.020)  | 0.237<br>(0.039)     | -0.18<br>(0.022)     | -0.224<br>(0.028)    | 0.05<br>(0.016)      |
| GES payment                         | 0.273***<br>(0.00)   | 0.277***<br>(0.003)  | 0.158**<br>(0.004)   | -0.484***<br>(0.01)  | -0.512***<br>(0.007) | -0.287***<br>(0.005) |
| <i>Policyholder</i>                 |                      |                      |                      |                      |                      |                      |
| Residence in Metropolitan region    | 0.012<br>(0.00)      | 0.009<br>(0.001)     | 0.059*<br>(0.001)    | 0.058<br>(0.00)      | 0.061<br>(0.002)     | 0.051<br>(0.001)     |
| Q1 of annual income                 | 0<br>(0.00)          | 0<br>(0.000)         | -0.001*<br>(0.000)   | -0.001*<br>(0.00)    | -0.001<br>(0.000)    | -0.001<br>(0.000)    |
| Q2 of annual income                 | -0.029<br>(0.00)     | -0.023<br>(0.004)    | -0.06<br>(0.005)     | -0.032<br>(0.01)     | -0.01<br>(0.009)     | -0.16**<br>(0.005)   |
| Q3 of annual income                 | 0.099*<br>(0.00)     | 0.13**<br>(0.004)    | -0.227***<br>(0.006) | 0.129<br>(0.01)      | 0.143<br>(0.008)     | 0.08<br>(0.005)      |
| Q4 of annual income                 | 0.022<br>(0.01)      | 0.056<br>(0.010)     | -0.359***<br>(0.014) | -0.124<br>(0.02)     | -0.05<br>(0.025)     | -0.602***<br>(0.016) |
| Policyholder's demographic controls | Yes                  | Yes                  | Yes                  | Yes                  | Yes                  | Yes                  |
| Year dummies                        | Yes                  | Yes                  | Yes                  | Yes                  | Yes                  | Yes                  |
| Observations                        | 3 644                | 3 644                | 3 644                | 3 644                | 3 644                | 3 644                |

Note: Robust standard errors in parentheses, clustered at the policy holder's id level. \*\*\*  $p < 0.01$ , \*\*  $p < 0.05$ , \*  $p < 0.1$ . The reference category for type of cancer is "other cancer" diagnosis. Abbreviations: GES, Garantías Explícitas de Salud; Q1, Q2, Q3, Q4, first, second, third, and fourth quintile of income distribution, respectively.
